# Supplementary material for: Engineered Microenvironment of Imidazolium Salts by Multi-scale Modeling and Machine Learning Algorithms for Enhanced Electrocatalytic CO2 Reduction to Ethylene and Acetamide via Targeted Delivery of CuAg Alloy Tandem Catalyst Based on Cu(111) Facet
Source: Research Square preprint supplement (doi:10.21203/rs.3.rs-6647633/v1), 2025-05-19
Supplement: Supplementary file 2 [file Pearson.xlsx]

## Sheet: Sheet1
UL	CCOHNH2	Cat_MolWt	Cat_LogP	Cat_TPSA	Cat_HDonors	Cat_HAcceptors	Cat_RotBonds	An_MolWt	An_LogP	An_TPSA	An_HDonors	An_HAcceptors	An_RotBonds	path	Min_EN	Max_EN	Range_EN	Mean_EN	AvgDev_EN	Mean_GSgap	AvgDev_GSgap	HOMO	LUMO	band gap
-1.85981	-1.26651	109.152	0.4131	8.81	0	1	1	35.453	-2.996	0	0	0	0	1	1.9	3.44	1.54	2.14141	0.30399	2.0543	2.947	0.1721	-0.2228	0.3949
-2.58115	-1.24616	139.222	1.1127	8.81	0	1	3	79.904	-2.996	0	0	0	0	1	1.9	3.44	1.54	2.14367	0.299025	2.17981	3.05466	0.1392	-0.27137	0.41057
-1.56167	-0.24816	139.222	1.1127	8.81	0	1	3	35.453	-2.996	0	0	0	0	1	1.9	3.44	1.54	2.14469	0.300285	2.1851	3.05468	0.14225	-0.29154	0.43379
-2.36455	-1.07338	139.222	1.1127	8.81	0	1	3	86.804	1.3	0	0	0	0	1	1.9	3.98	2.08	2.1758	0.333276	2.17595	2.99581	0.10216	-0.39471	0.49687
-1.45674	-0.39222	139.222	1.1127	8.81	0	1	3	144.962	3.3824	0	0	0	0	1	1.9	3.98	2.08	2.19441	0.350966	2.17441	2.96703	0.09626	-0.40182	0.49808
-2.39984	0.0464	153.249	1.42112	8.81	0	1	3	35.453	-2.996	0	0	0	0	1	1.9	3.44	1.54	2.14729	0.298911	2.25367	3.10305	0.14701	-0.28756	0.43457
-2.45794	0.53466	153.249	1.42112	8.81	0	1	3	144.962	3.3824	0	0	0	0	1	1.9	3.98	2.08	2.1962	0.347959	2.24114	3.01735	0.12914	-0.37951	0.50865
-2.6246	0.47466	153.249	1.42112	8.81	0	1	3	86.804	1.3	0	0	0	0	1	1.9	3.98	2.08	2.17788	0.330853	2.24331	3.04577	0.13619	-0.37067	0.50686
-2.97101	-1.96436	139.222	1.1127	8.81	0	1	3	197.657	2.7555	0	0	0	0	1	1.83	3.44	1.61	2.15835	0.314087	2.17879	3.00673	0.127459	-0.342454	0.469913
-3.77229	-1.20007	97.141	-0.1504	8.81	0	1	0	35.453	-2.996	0	0	0	0	1	1.9	3.44	1.54	2.13642	0.304026	1.96617	2.88091	0.13988	-0.29366	0.43354
-4.36514	-0.49573	97.141	-0.1504	8.81	0	1	0	126.904	-2.996	0	0	0	0	1	1.9	3.44	1.54	2.13374	0.300566	1.95851	2.87928	0.134855	-0.334505	0.46936
-3.44225	-1.38504	97.141	-0.1504	8.81	0	1	0	111.098	-0.6415	58.59	0	4	2	1	1.9	3.44	1.54	2.16328	0.324894	2.02788	2.93263	0.12983	-0.37535	0.50518
-2.14477	-0.22428	111.168	0.3325	8.81	0	1	1	35.453	-2.996	0	0	0	0	1	1.9	3.44	1.54	2.13926	0.302851	2.04145	2.94398	0.14377	-0.29334	0.43711
-2.21175	-2.26228	125.195	0.7226	8.81	0	1	2	86.804	1.3	0	0	0	0	1	1.9	3.98	2.08	2.17365	0.335694	2.10654	2.94136	0.1338	-0.39354	0.52734
-4.12518	1.61465	82.106	0.4201	17.82	0	2	0	80.912	0.5779	0	0	0	0	1	1.9	3.44	1.54	2.13239	0.303689	1.8828	2.80836	0.14046	-0.31289	0.45335
-1.92746	-2.02652	82.106	0.4201	17.82	0	2	0	149.069	0.0514	57.2	0	3	0	1	1.9	3.98	2.08	2.18215	0.355599	1.87218	2.74455	0.19041	-0.30967	0.50008
-1.84167	-1.26651	109.152	0.4131	8.81	0	1	1	35.453	-2.996	0	0	0	0	2	1.9	3.44	1.54	2.14141	0.30399	2.0543	2.947	0.1721	-0.2228	0.3949
-1.93299	-1.24616	139.222	1.1127	8.81	0	1	3	79.904	-2.996	0	0	0	0	2	1.9	3.44	1.54	2.14367	0.299025	2.17981	3.05466	0.1392	-0.27137	0.41057
-1.46716	-0.24816	139.222	1.1127	8.81	0	1	3	35.453	-2.996	0	0	0	0	2	1.9	3.44	1.54	2.14469	0.300285	2.1851	3.05468	0.14225	-0.29154	0.43379
-0.83671	-1.07338	139.222	1.1127	8.81	0	1	3	86.804	1.3	0	0	0	0	2	1.9	3.98	2.08	2.1758	0.333276	2.17595	2.99581	0.10216	-0.39471	0.49687
-1.00206	-0.39222	139.222	1.1127	8.81	0	1	3	144.962	3.3824	0	0	0	0	2	1.9	3.98	2.08	2.19441	0.350966	2.17441	2.96703	0.09626	-0.40182	0.49808
-1.5468	0.0464	153.249	1.42112	8.81	0	1	3	35.453	-2.996	0	0	0	0	2	1.9	3.44	1.54	2.14729	0.298911	2.25367	3.10305	0.14701	-0.28756	0.43457
-1.4526	0.53466	153.249	1.42112	8.81	0	1	3	144.962	3.3824	0	0	0	0	2	1.9	3.98	2.08	2.1962	0.347959	2.24114	3.01735	0.12914	-0.37951	0.50865
-2.30439	0.47466	153.249	1.42112	8.81	0	1	3	86.804	1.3	0	0	0	0	2	1.9	3.98	2.08	2.17788	0.330853	2.24331	3.04577	0.13619	-0.37067	0.50686
-1.44748	-1.96436	139.222	1.1127	8.81	0	1	3	197.657	2.7555	0	0	0	0	2	1.83	3.44	1.61	2.15835	0.314087	2.17879	3.00673	0.127459	-0.342454	0.469913
-3.77229	-1.20007	97.141	-0.1504	8.81	0	1	0	35.453	-2.996	0	0	0	0	2	1.9	3.44	1.54	2.13642	0.304026	1.96617	2.88091	0.13988	-0.29366	0.43354
-2.46412	-0.49573	97.141	-0.1504	8.81	0	1	0	126.904	-2.996	0	0	0	0	2	1.9	3.44	1.54	2.13374	0.300566	1.95851	2.87928	0.134855	-0.334505	0.46936
-3.44225	-1.38504	97.141	-0.1504	8.81	0	1	0	111.098	-0.6415	58.59	0	4	2	2	1.9	3.44	1.54	2.16328	0.324894	2.02788	2.93263	0.12983	-0.37535	0.50518
-2.75008	-0.22428	111.168	0.3325	8.81	0	1	1	35.453	-2.996	0	0	0	0	2	1.9	3.44	1.54	2.13926	0.302851	2.04145	2.94398	0.14377	-0.29334	0.43711
-3.65806	-2.26228	125.195	0.7226	8.81	0	1	2	86.804	1.3	0	0	0	0	2	1.9	3.98	2.08	2.17365	0.335694	2.10654	2.94136	0.1338	-0.39354	0.52734
-3.87315	1.61465	82.106	0.4201	17.82	0	2	0	80.912	0.5779	0	0	0	0	2	1.9	3.44	1.54	2.13239	0.303689	1.8828	2.80836	0.14046	-0.31289	0.45335
-4.21347	-2.02652	82.106	0.4201	17.82	0	2	0	149.069	0.0514	57.2	0	3	0	2	1.9	3.98	2.08	2.18215	0.355599	1.87218	2.74455	0.19041	-0.30967	0.50008
-3.62572	-1.26651	109.152	0.4131	8.81	0	1	1	35.453	-2.996	0	0	0	0	3	1.9	3.44	1.54	2.14141	0.30399	2.0543	2.947	0.1721	-0.2228	0.3949
-2.6587	-1.24616	139.222	1.1127	8.81	0	1	3	79.904	-2.996	0	0	0	0	3	1.9	3.44	1.54	2.14367	0.299025	2.17981	3.05466	0.1392	-0.27137	0.41057
-3.00161	-0.24816	139.222	1.1127	8.81	0	1	3	35.453	-2.996	0	0	0	0	3	1.9	3.44	1.54	2.14469	0.300285	2.1851	3.05468	0.14225	-0.29154	0.43379
-3.12338	-1.07338	139.222	1.1127	8.81	0	1	3	86.804	1.3	0	0	0	0	3	1.9	3.98	2.08	2.1758	0.333276	2.17595	2.99581	0.10216	-0.39471	0.49687
-3.0309	-0.39222	139.222	1.1127	8.81	0	1	3	144.962	3.3824	0	0	0	0	3	1.9	3.98	2.08	2.19441	0.350966	2.17441	2.96703	0.09626	-0.40182	0.49808
-2.58931	0.0464	153.249	1.42112	8.81	0	1	3	35.453	-2.996	0	0	0	0	3	1.9	3.44	1.54	2.14729	0.298911	2.25367	3.10305	0.14701	-0.28756	0.43457
-3.43714	0.53466	153.249	1.42112	8.81	0	1	3	144.962	3.3824	0	0	0	0	3	1.9	3.98	2.08	2.1962	0.347959	2.24114	3.01735	0.12914	-0.37951	0.50865
-2.033	0.47466	153.249	1.42112	8.81	0	1	3	86.804	1.3	0	0	0	0	3	1.9	3.98	2.08	2.17788	0.330853	2.24331	3.04577	0.13619	-0.37067	0.50686
-4.31016	-1.96436	139.222	1.1127	8.81	0	1	3	197.657	2.7555	0	0	0	0	3	1.83	3.44	1.61	2.15835	0.314087	2.17879	3.00673	0.127459	-0.342454	0.469913
-2.06108	-1.20007	97.141	-0.1504	8.81	0	1	0	35.453	-2.996	0	0	0	0	3	1.9	3.44	1.54	2.13642	0.304026	1.96617	2.88091	0.13988	-0.29366	0.43354
-2.53268	-0.49573	97.141	-0.1504	8.81	0	1	0	126.904	-2.996	0	0	0	0	3	1.9	3.44	1.54	2.13374	0.300566	1.95851	2.87928	0.134855	-0.334505	0.46936
-4.61895	-1.38504	97.141	-0.1504	8.81	0	1	0	111.098	-0.6415	58.59	0	4	2	3	1.9	3.44	1.54	2.16328	0.324894	2.02788	2.93263	0.12983	-0.37535	0.50518
-2.75885	-0.22428	111.168	0.3325	8.81	0	1	1	35.453	-2.996	0	0	0	0	3	1.9	3.44	1.54	2.13926	0.302851	2.04145	2.94398	0.14377	-0.29334	0.43711
-3.85001	-2.26228	125.195	0.7226	8.81	0	1	2	86.804	1.3	0	0	0	0	3	1.9	3.98	2.08	2.17365	0.335694	2.10654	2.94136	0.1338	-0.39354	0.52734
-3.87315	1.61465	82.106	0.4201	17.82	0	2	0	80.912	0.5779	0	0	0	0	3	1.9	3.44	1.54	2.13239	0.303689	1.8828	2.80836	0.14046	-0.31289	0.45335
-3.03737	-2.02652	82.106	0.4201	17.82	0	2	0	149.069	0.0514	57.2	0	3	0	3	1.9	3.98	2.08	2.18215	0.355599	1.87218	2.74455	0.19041	-0.30967	0.50008

## Sheet: Sheet2
*CO2	*COOH	*CO	*CO+*COOH	*COCO	*COCOH	*COHCOH	*CHOHCOH	*CHOHCHOH	*CHCHOH	*CHCH	*CH2CH	*CH2CH2	CH2CH2	*H	*COH	*COH*COOH	*CHO	*CHO*COOH	*CHOCO	*CHOCHO	*CHOHCHO	*CHOCOH	*CHOHCOH	*CHOHCO
1.80614	1.63709	2.04419	2.197	4.05681	3.46511	5.30678	4.01836	0.97174	0.78865	0.88187	0.3746	-0.41944	2.39006	0.35554	3.07113	4.73365	1.66293	5.28865	3.5427	0.08449	-2.14558	5.72581	4.01836	2.87366
2.15691	1.96587	0.99773	3.57888	4.34735	3.61987	3.32608	2.30266	1.18942	1.12285	1.09419	0.22844	-0.92216	2.39006	-0.12154	2.50384	4.43683	1.3568	4.0155	3.1452	-0.52937	-2.51119	5.81033	2.30266	2.90943
2.74487	1.85955	1.43257	2.89207	4.45374	4.5482	3.94722	2.55603	1.29814	1.01713	1.40556	1.17416	-0.581	2.39006	0.33885	1.79229	3.25945	1.70436	4.70597	2.97869	-0.3734	-1.61328	6.36999	2.55603	2.98793
1.6149	2.1496	1.15576	3.52031	3.12307	3.37172	3.6803	3.27252	1.21414	1.53654	-0.05303	0.20035	-0.84719	2.39006	-0.83042	1.83576	2.67247	1.08431	4.20769	1.89137	-1.3189	-1.99958	4.70108	3.27252	2.57961
1.65539	1.96148	1.28015	2.73689	3.88845	3.50891	3.79677	2.96626	0.48738	0.86841	1.54637	-0.11578	-0.85652	2.39006	-0.58675	2.28221	2.61935	1.35121	4.38211	3.64742	-0.66164	-2.74134	6.05137	2.96626	2.45486
2.23533	2.01983	1.32876	3.7286	4.47098	3.60829	2.80548	2.11594	0.71989	1.66977	1.61161	0.44698	-0.53108	2.39006	-0.53346	2.39066	3.93746	1.32648	3.91579	3.5815	0.07335	-2.40592	5.4964	2.11594	3.42347
1.89192	2.78528	1.5995	4.05744	3.58546	3.62147	3.78558	1.50785	1.00197	1.12601	1.09246	0.31376	-1.1033	2.39006	0.22359	2.60899	3.58215	1.28855	3.95617	3.28347	-0.9317	-1.92791	5.24937	1.50785	6.72061
1.88248	1.62995	1.11388	3.73848	4.49455	3.64738	5.95177	2.13891	1.85101	1.16799	1.31555	0.55621	-0.53242	2.39006	0.07469	2.08893	3.8434	1.8075	3.74101	2.69591	0.77614	-1.87627	6.301	2.13891	3.58851
2.24312	2.30516	3.63143	4.0797	7.05071	4.45248	5.82808	2.30114	3.96159	2.71941	2.62478	2.68918	0.59282	2.39006	0.90991	4.42785	3.65116	2.50474	6.8149	4.93651	2.11543	0.64593	7.50004	2.30114	4.48844
2.63008	1.41601	1.79795	3.36454	5.51493	2.62469	6.39698	2.3526	1.02704	1.06144	0.82632	0.66042	-0.34366	2.39006	-0.12221	2.13281	4.56056	1.95529	4.01637	3.08421	0.05972	-1.60893	5.75317	2.3526	2.33846
1.47297	1.21015	3.31273	1.27757	5.64271	2.77988	5.244	2.01577	0.2382	0.89151	-0.08739	0.22017	-1.11568	2.39006	-0.39728	1.64603	4.08522	0.80249	3.33517	5.77912	-0.04694	-2.69115	5.77037	2.01577	2.01162
-1.94378	-0.04339	2.49214	4.22776	-0.06337	2.09536	3.94855	-1.49691	-2.3364	2.07195	-3.00115	1.25593	-0.1717	2.39006	-0.48632	2.81938	1.31559	1.89144	0.11133	-0.76523	-2.05107	-4.8386	1.90995	-1.49691	3.85372
1.90316	2.89402	1.7723	3.378	5.52277	4.65657	6.44607	3.31041	0.97905	1.47547	0.85994	1.30212	0.04428	2.39006	-0.36876	2.62959	5.37967	1.87943	4.63828	2.65948	0.36409	-1.66348	6.32761	3.31041	3.95968
2.69896	2.65114	1.66415	3.48493	4.76676	3.15198	5.36373	3.53141	1.16874	1.59788	2.5984	1.13711	-0.73259	2.39006	-2.0817	2.58899	6.24705	0.08511	3.93512	6.23496	-1.10232	-1.13515	4.66984	3.53141	3.76187
0.25454	-0.90204	2.97111	0.202	4.32718	1.55723	1.84492	2.79674	0.7112	1.1965	1.99867	0.63793	-0.48344	2.39006	0.95527	3.68609	3.06079	-1.25032	1.75216	-0.09326	-0.49643	-2.08355	4.43061	2.79674	0.29465
3.13009	1.23496	2.90665	4.26191	4.00894	2.81023	4.50653	1.51692	2.66079	2.48304	4.87434	0.69509	0.59706	2.39006	2.35013	0.65908	4.87255	2.6189	3.75208	2.62324	4.57232	-0.44053	6.79617	1.51692	5.66061
