# Supplementary material for: Engineered Microenvironment of Imidazolium Salts by Multi-scale Modeling and Machine Learning Algorithms for Enhanced Electrocatalytic CO2 Reduction to Ethylene and Acetamide via Targeted Delivery of CuAg Alloy Tandem Catalyst Based on Cu(111) Facet
Source: Research Square preprint supplement (doi:10.21203/rs.3.rs-6647633/v1), 2025-05-19
Supplement: Supplementary file 5 [file Pearson_Simplified.xlsx]

## Sheet: Sheet1
UL	CCOHNH2	Cat_LogP	Cat_TPSA	An_MolWt	An_LogP	An_HAcceptors	An_RotBonds	path	Min_EN	Max_EN	AvgDev_GSgap	HOMO	LUMO
-1.85981	-1.26651	0.4131	8.81	35.453	-2.996	0	0	1	1.9	3.44	2.947	0.1721	-0.2228
-2.58115	-1.24616	1.1127	8.81	79.904	-2.996	0	0	1	1.9	3.44	3.05466	0.1392	-0.27137
-1.56167	-0.24816	1.1127	8.81	35.453	-2.996	0	0	1	1.9	3.44	3.05468	0.14225	-0.29154
-2.36455	-1.07338	1.1127	8.81	86.804	1.3	0	0	1	1.9	3.98	2.99581	0.10216	-0.39471
-1.45674	-0.39222	1.1127	8.81	144.962	3.3824	0	0	1	1.9	3.98	2.96703	0.09626	-0.40182
-2.39984	0.0464	1.42112	8.81	35.453	-2.996	0	0	1	1.9	3.44	3.10305	0.14701	-0.28756
-2.45794	0.53466	1.42112	8.81	144.962	3.3824	0	0	1	1.9	3.98	3.01735	0.12914	-0.37951
-2.6246	0.47466	1.42112	8.81	86.804	1.3	0	0	1	1.9	3.98	3.04577	0.13619	-0.37067
-2.97101	-1.96436	1.1127	8.81	197.657	2.7555	0	0	1	1.83	3.44	3.00673	0.127459	-0.342454
-3.77229	-1.20007	-0.1504	8.81	35.453	-2.996	0	0	1	1.9	3.44	2.88091	0.13988	-0.29366
-4.36514	-0.49573	-0.1504	8.81	126.904	-2.996	0	0	1	1.9	3.44	2.87928	0.134855	-0.334505
-3.44225	-1.38504	-0.1504	8.81	111.098	-0.6415	4	2	1	1.9	3.44	2.93263	0.12983	-0.37535
-2.14477	-0.22428	0.3325	8.81	35.453	-2.996	0	0	1	1.9	3.44	2.94398	0.14377	-0.29334
-2.21175	-2.26228	0.7226	8.81	86.804	1.3	0	0	1	1.9	3.98	2.94136	0.1338	-0.39354
-4.12518	1.61465	0.4201	17.82	80.912	0.5779	0	0	1	1.9	3.44	2.80836	0.14046	-0.31289
-1.92746	-2.02652	0.4201	17.82	149.069	0.0514	3	0	1	1.9	3.98	2.74455	0.19041	-0.30967
-1.84167	-1.26651	0.4131	8.81	35.453	-2.996	0	0	2	1.9	3.44	2.947	0.1721	-0.2228
-1.93299	-1.24616	1.1127	8.81	79.904	-2.996	0	0	2	1.9	3.44	3.05466	0.1392	-0.27137
-1.46716	-0.24816	1.1127	8.81	35.453	-2.996	0	0	2	1.9	3.44	3.05468	0.14225	-0.29154
-0.83671	-1.07338	1.1127	8.81	86.804	1.3	0	0	2	1.9	3.98	2.99581	0.10216	-0.39471
-1.00206	-0.39222	1.1127	8.81	144.962	3.3824	0	0	2	1.9	3.98	2.96703	0.09626	-0.40182
-1.5468	0.0464	1.42112	8.81	35.453	-2.996	0	0	2	1.9	3.44	3.10305	0.14701	-0.28756
-1.4526	0.53466	1.42112	8.81	144.962	3.3824	0	0	2	1.9	3.98	3.01735	0.12914	-0.37951
-2.30439	0.47466	1.42112	8.81	86.804	1.3	0	0	2	1.9	3.98	3.04577	0.13619	-0.37067
-1.44748	-1.96436	1.1127	8.81	197.657	2.7555	0	0	2	1.83	3.44	3.00673	0.127459	-0.342454
-3.77229	-1.20007	-0.1504	8.81	35.453	-2.996	0	0	2	1.9	3.44	2.88091	0.13988	-0.29366
-2.46412	-0.49573	-0.1504	8.81	126.904	-2.996	0	0	2	1.9	3.44	2.87928	0.134855	-0.334505
-3.44225	-1.38504	-0.1504	8.81	111.098	-0.6415	4	2	2	1.9	3.44	2.93263	0.12983	-0.37535
-2.75008	-0.22428	0.3325	8.81	35.453	-2.996	0	0	2	1.9	3.44	2.94398	0.14377	-0.29334
-3.65806	-2.26228	0.7226	8.81	86.804	1.3	0	0	2	1.9	3.98	2.94136	0.1338	-0.39354
-3.87315	1.61465	0.4201	17.82	80.912	0.5779	0	0	2	1.9	3.44	2.80836	0.14046	-0.31289
-4.21347	-2.02652	0.4201	17.82	149.069	0.0514	3	0	2	1.9	3.98	2.74455	0.19041	-0.30967
-3.62572	-1.26651	0.4131	8.81	35.453	-2.996	0	0	3	1.9	3.44	2.947	0.1721	-0.2228
-2.6587	-1.24616	1.1127	8.81	79.904	-2.996	0	0	3	1.9	3.44	3.05466	0.1392	-0.27137
-3.00161	-0.24816	1.1127	8.81	35.453	-2.996	0	0	3	1.9	3.44	3.05468	0.14225	-0.29154
-3.12338	-1.07338	1.1127	8.81	86.804	1.3	0	0	3	1.9	3.98	2.99581	0.10216	-0.39471
-3.0309	-0.39222	1.1127	8.81	144.962	3.3824	0	0	3	1.9	3.98	2.96703	0.09626	-0.40182
-2.58931	0.0464	1.42112	8.81	35.453	-2.996	0	0	3	1.9	3.44	3.10305	0.14701	-0.28756
-3.43714	0.53466	1.42112	8.81	144.962	3.3824	0	0	3	1.9	3.98	3.01735	0.12914	-0.37951
-2.033	0.47466	1.42112	8.81	86.804	1.3	0	0	3	1.9	3.98	3.04577	0.13619	-0.37067
-4.31016	-1.96436	1.1127	8.81	197.657	2.7555	0	0	3	1.83	3.44	3.00673	0.127459	-0.342454
-2.06108	-1.20007	-0.1504	8.81	35.453	-2.996	0	0	3	1.9	3.44	2.88091	0.13988	-0.29366
-2.53268	-0.49573	-0.1504	8.81	126.904	-2.996	0	0	3	1.9	3.44	2.87928	0.134855	-0.334505
-4.61895	-1.38504	-0.1504	8.81	111.098	-0.6415	4	2	3	1.9	3.44	2.93263	0.12983	-0.37535
-2.75885	-0.22428	0.3325	8.81	35.453	-2.996	0	0	3	1.9	3.44	2.94398	0.14377	-0.29334
-3.85001	-2.26228	0.7226	8.81	86.804	1.3	0	0	3	1.9	3.98	2.94136	0.1338	-0.39354
-3.87315	1.61465	0.4201	17.82	80.912	0.5779	0	0	3	1.9	3.44	2.80836	0.14046	-0.31289
-3.03737	-2.02652	0.4201	17.82	149.069	0.0514	3	0	3	1.9	3.98	2.74455	0.19041	-0.30967

## Sheet: Sheet2
*CO2	*COOH	*CO	*CO+*COOH	*COCO	*COCOH	*COHCOH	*CHOHCOH	*CHOHCHOH	*CHCHOH	*CHCH	*CH2CH	*CH2CH2	CH2CH2	*H	*COH	*COH*COOH	*CHO	*CHO*COOH	*CHOCO	*CHOCHO	*CHOHCHO	*CHOCOH	*CHOHCOH	*CHOHCO
1.80614	1.63709	2.04419	2.197	4.05681	3.46511	5.30678	4.01836	0.97174	0.78865	0.88187	0.3746	-0.41944	2.39006	0.35554	3.07113	4.73365	1.66293	5.28865	3.5427	0.08449	-2.14558	5.72581	4.01836	2.87366
2.15691	1.96587	0.99773	3.57888	4.34735	3.61987	3.32608	2.30266	1.18942	1.12285	1.09419	0.22844	-0.92216	2.39006	-0.12154	2.50384	4.43683	1.3568	4.0155	3.1452	-0.52937	-2.51119	5.81033	2.30266	2.90943
2.74487	1.85955	1.43257	2.89207	4.45374	4.5482	3.94722	2.55603	1.29814	1.01713	1.40556	1.17416	-0.581	2.39006	0.33885	1.79229	3.25945	1.70436	4.70597	2.97869	-0.3734	-1.61328	6.36999	2.55603	2.98793
1.6149	2.1496	1.15576	3.52031	3.12307	3.37172	3.6803	3.27252	1.21414	1.53654	-0.05303	0.20035	-0.84719	2.39006	-0.83042	1.83576	2.67247	1.08431	4.20769	1.89137	-1.3189	-1.99958	4.70108	3.27252	2.57961
1.65539	1.96148	1.28015	2.73689	3.88845	3.50891	3.79677	2.96626	0.48738	0.86841	1.54637	-0.11578	-0.85652	2.39006	-0.58675	2.28221	2.61935	1.35121	4.38211	3.64742	-0.66164	-2.74134	6.05137	2.96626	2.45486
2.23533	2.01983	1.32876	3.7286	4.47098	3.60829	2.80548	2.11594	0.71989	1.66977	1.61161	0.44698	-0.53108	2.39006	-0.53346	2.39066	3.93746	1.32648	3.91579	3.5815	0.07335	-2.40592	5.4964	2.11594	3.42347
1.89192	2.78528	1.5995	4.05744	3.58546	3.62147	3.78558	1.50785	1.00197	1.12601	1.09246	0.31376	-1.1033	2.39006	0.22359	2.60899	3.58215	1.28855	3.95617	3.28347	-0.9317	-1.92791	5.24937	1.50785	6.72061
1.88248	1.62995	1.11388	3.73848	4.49455	3.64738	5.95177	2.13891	1.85101	1.16799	1.31555	0.55621	-0.53242	2.39006	0.07469	2.08893	3.8434	1.8075	3.74101	2.69591	0.77614	-1.87627	6.301	2.13891	3.58851
2.24312	2.30516	3.63143	4.0797	7.05071	4.45248	5.82808	2.30114	3.96159	2.71941	2.62478	2.68918	0.59282	2.39006	0.90991	4.42785	3.65116	2.50474	6.8149	4.93651	2.11543	0.64593	7.50004	2.30114	4.48844
2.63008	1.41601	1.79795	3.36454	5.51493	2.62469	6.39698	2.3526	1.02704	1.06144	0.82632	0.66042	-0.34366	2.39006	-0.12221	2.13281	4.56056	1.95529	4.01637	3.08421	0.05972	-1.60893	5.75317	2.3526	2.33846
1.47297	1.21015	3.31273	1.27757	5.64271	2.77988	5.244	2.01577	0.2382	0.89151	-0.08739	0.22017	-1.11568	2.39006	-0.39728	1.64603	4.08522	0.80249	3.33517	5.77912	-0.04694	-2.69115	5.77037	2.01577	2.01162
-1.94378	-0.04339	2.49214	4.22776	-0.06337	2.09536	3.94855	-1.49691	-2.3364	2.07195	-3.00115	1.25593	-0.1717	2.39006	-0.48632	2.81938	1.31559	1.89144	0.11133	-0.76523	-2.05107	-4.8386	1.90995	-1.49691	3.85372
1.90316	2.89402	1.7723	3.378	5.52277	4.65657	6.44607	3.31041	0.97905	1.47547	0.85994	1.30212	0.04428	2.39006	-0.36876	2.62959	5.37967	1.87943	4.63828	2.65948	0.36409	-1.66348	6.32761	3.31041	3.95968
2.69896	2.65114	1.66415	3.48493	4.76676	3.15198	5.36373	3.53141	1.16874	1.59788	2.5984	1.13711	-0.73259	2.39006	-2.0817	2.58899	6.24705	0.08511	3.93512	6.23496	-1.10232	-1.13515	4.66984	3.53141	3.76187
0.25454	-0.90204	2.97111	0.202	4.32718	1.55723	1.84492	2.79674	0.7112	1.1965	1.99867	0.63793	-0.48344	2.39006	0.95527	3.68609	3.06079	-1.25032	1.75216	-0.09326	-0.49643	-2.08355	4.43061	2.79674	0.29465
3.13009	1.23496	2.90665	4.26191	4.00894	2.81023	4.50653	1.51692	2.66079	2.48304	4.87434	0.69509	0.59706	2.39006	2.35013	0.65908	4.87255	2.6189	3.75208	2.62324	4.57232	-0.44053	6.79617	1.51692	5.66061
