# Supplementary material for: Engineered Microenvironment of Imidazolium Salts by Multi-scale Modeling and Machine Learning Algorithms for Enhanced Electrocatalytic CO2 Reduction to Ethylene and Acetamide via Targeted Delivery of CuAg Alloy Tandem Catalyst Based on Cu(111) Facet
Source: Research Square preprint supplement (doi:10.21203/rs.3.rs-6647633/v1), 2025-05-19
Supplement: Supplementary file 8 [file data.xlsx]

## Sheet: Sheet1
UL	E_cplg (CC(=O)N)	Cat_LogP	Cat_TPSA	An_MolWt	An_LogP	An_HAcceptors	An_RotBonds	path	Min_EN	Max_EN	AvgDev_GSgap	HOMO	LUMO
-1.85981	-1.26651	0.4131	8.81	35.453	-2.996	0	0	1	1.9	3.44	2.947	0.1721	-0.2228
-2.58115	-1.24616	1.1127	8.81	79.904	-2.996	0	0	1	1.9	3.44	3.05466	0.1392	-0.27137
-1.56167	-0.24816	1.1127	8.81	35.453	-2.996	0	0	1	1.9	3.44	3.05468	0.14225	-0.29154
-2.36455	-1.07338	1.1127	8.81	86.804	1.3	0	0	1	1.9	3.98	2.99581	0.10216	-0.39471
-1.45674	-0.39222	1.1127	8.81	144.962	3.3824	0	0	1	1.9	3.98	2.96703	0.09626	-0.40182
-2.39984	0.0464	1.42112	8.81	35.453	-2.996	0	0	1	1.9	3.44	3.10305	0.14701	-0.28756
-2.45794	0.53466	1.42112	8.81	144.962	3.3824	0	0	1	1.9	3.98	3.01735	0.12914	-0.37951
-2.6246	0.47466	1.42112	8.81	86.804	1.3	0	0	1	1.9	3.98	3.04577	0.13619	-0.37067
-2.97101	-1.96436	1.1127	8.81	197.657	2.7555	0	0	1	1.83	3.44	3.00673	0.127459	-0.342454
-3.77229	-1.20007	-0.1504	8.81	35.453	-2.996	0	0	1	1.9	3.44	2.88091	0.13988	-0.29366
-4.36514	-0.49573	-0.1504	8.81	126.904	-2.996	0	0	1	1.9	3.44	2.87928	0.134855	-0.334505
-3.44225	-1.38504	-0.1504	8.81	111.098	-0.6415	4	2	1	1.9	3.44	2.93263	0.12983	-0.37535
-2.14477	-0.22428	0.3325	8.81	35.453	-2.996	0	0	1	1.9	3.44	2.94398	0.14377	-0.29334
-2.21175	-2.26228	0.7226	8.81	86.804	1.3	0	0	1	1.9	3.98	2.94136	0.1338	-0.39354
-4.12518	1.61465	0.4201	17.82	80.912	0.5779	0	0	1	1.9	3.44	2.80836	0.14046	-0.31289
-1.92746	-2.02652	0.4201	17.82	149.069	0.0514	3	0	1	1.9	3.98	2.74455	0.19041	-0.30967
-1.84167	-1.26651	0.4131	8.81	35.453	-2.996	0	0	2	1.9	3.44	2.947	0.1721	-0.2228
-1.93299	-1.24616	1.1127	8.81	79.904	-2.996	0	0	2	1.9	3.44	3.05466	0.1392	-0.27137
-1.46716	-0.24816	1.1127	8.81	35.453	-2.996	0	0	2	1.9	3.44	3.05468	0.14225	-0.29154
-0.83671	-1.07338	1.1127	8.81	86.804	1.3	0	0	2	1.9	3.98	2.99581	0.10216	-0.39471
-1.00206	-0.39222	1.1127	8.81	144.962	3.3824	0	0	2	1.9	3.98	2.96703	0.09626	-0.40182
-1.5468	0.0464	1.42112	8.81	35.453	-2.996	0	0	2	1.9	3.44	3.10305	0.14701	-0.28756
-1.4526	0.53466	1.42112	8.81	144.962	3.3824	0	0	2	1.9	3.98	3.01735	0.12914	-0.37951
-2.30439	0.47466	1.42112	8.81	86.804	1.3	0	0	2	1.9	3.98	3.04577	0.13619	-0.37067
-1.44748	-1.96436	1.1127	8.81	197.657	2.7555	0	0	2	1.83	3.44	3.00673	0.127459	-0.342454
-3.77229	-1.20007	-0.1504	8.81	35.453	-2.996	0	0	2	1.9	3.44	2.88091	0.13988	-0.29366
-2.46412	-0.49573	-0.1504	8.81	126.904	-2.996	0	0	2	1.9	3.44	2.87928	0.134855	-0.334505
-3.44225	-1.38504	-0.1504	8.81	111.098	-0.6415	4	2	2	1.9	3.44	2.93263	0.12983	-0.37535
-2.75008	-0.22428	0.3325	8.81	35.453	-2.996	0	0	2	1.9	3.44	2.94398	0.14377	-0.29334
-3.65806	-2.26228	0.7226	8.81	86.804	1.3	0	0	2	1.9	3.98	2.94136	0.1338	-0.39354
-3.87315	1.61465	0.4201	17.82	80.912	0.5779	0	0	2	1.9	3.44	2.80836	0.14046	-0.31289
-4.21347	-2.02652	0.4201	17.82	149.069	0.0514	3	0	2	1.9	3.98	2.74455	0.19041	-0.30967
-3.62572	-1.26651	0.4131	8.81	35.453	-2.996	0	0	3	1.9	3.44	2.947	0.1721	-0.2228
-2.6587	-1.24616	1.1127	8.81	79.904	-2.996	0	0	3	1.9	3.44	3.05466	0.1392	-0.27137
-3.00161	-0.24816	1.1127	8.81	35.453	-2.996	0	0	3	1.9	3.44	3.05468	0.14225	-0.29154
-3.12338	-1.07338	1.1127	8.81	86.804	1.3	0	0	3	1.9	3.98	2.99581	0.10216	-0.39471
-3.0309	-0.39222	1.1127	8.81	144.962	3.3824	0	0	3	1.9	3.98	2.96703	0.09626	-0.40182
-2.58931	0.0464	1.42112	8.81	35.453	-2.996	0	0	3	1.9	3.44	3.10305	0.14701	-0.28756
-3.43714	0.53466	1.42112	8.81	144.962	3.3824	0	0	3	1.9	3.98	3.01735	0.12914	-0.37951
-2.033	0.47466	1.42112	8.81	86.804	1.3	0	0	3	1.9	3.98	3.04577	0.13619	-0.37067
-4.31016	-1.96436	1.1127	8.81	197.657	2.7555	0	0	3	1.83	3.44	3.00673	0.127459	-0.342454
-2.06108	-1.20007	-0.1504	8.81	35.453	-2.996	0	0	3	1.9	3.44	2.88091	0.13988	-0.29366
-2.53268	-0.49573	-0.1504	8.81	126.904	-2.996	0	0	3	1.9	3.44	2.87928	0.134855	-0.334505
-4.61895	-1.38504	-0.1504	8.81	111.098	-0.6415	4	2	3	1.9	3.44	2.93263	0.12983	-0.37535
-2.75885	-0.22428	0.3325	8.81	35.453	-2.996	0	0	3	1.9	3.44	2.94398	0.14377	-0.29334
-3.85001	-2.26228	0.7226	8.81	86.804	1.3	0	0	3	1.9	3.98	2.94136	0.1338	-0.39354
-3.87315	1.61465	0.4201	17.82	80.912	0.5779	0	0	3	1.9	3.44	2.80836	0.14046	-0.31289
-3.03737	-2.02652	0.4201	17.82	149.069	0.0514	3	0	3	1.9	3.98	2.74455	0.19041	-0.30967
