# Supplementary material for: Engineered Microenvironment of Imidazolium Salts by Multi-scale Modeling and Machine Learning Algorithms for Enhanced Electrocatalytic CO2 Reduction to Ethylene and Acetamide via Targeted Delivery of CuAg Alloy Tandem Catalyst Based on Cu(111) Facet
Source: Research Square preprint supplement (doi:10.21203/rs.3.rs-6647633/v1), 2025-05-19
Supplement: Supplementary file 23 [file data.xlsx]

## Sheet: Sheet1
UL	COCO	COCOH	COCHO	CHOCOH	Cat_LogP	Cat_TPSA	An_MolWt	An_LogP	An_HAcceptors	An_RotBonds	path	Min_EN	Max_EN	AvgDev_GSgap	HOMO	LUMO
-1.85981	-0.81872	-0.5438	0.90396	2.4395	0.4131	8.81	35.453	-2.996	0	0	1	1.9	3.44	2.947	0.1721	-0.2228
-2.58115	-2.24274	-1.19232	-0.19946	2.97589	1.1127	8.81	79.904	-2.996	0	0	1	1.9	3.44	3.05466	0.1392	-0.27137
-1.56167	-1.93525	-1.48124	0.14798	2.41094	1.1127	8.81	35.453	-2.996	0	0	1	1.9	3.44	3.05468	0.14225	-0.29154
-2.36455	-0.8982	-0.29623	1.08712	1.31425	1.1127	8.81	86.804	1.3	0	0	1	1.9	3.98	2.99581	0.10216	-0.39471
-1.45674	-2.10063	-0.52995	-1.60506	1.26298	1.1127	8.81	144.962	3.3824	0	0	1	1.9	3.98	2.96703	0.09626	-0.40182
-2.39984	-1.59168	-0.31487	-0.70992	3.42504	1.42112	8.81	35.453	-2.996	0	0	1	1.9	3.44	3.10305	0.14701	-0.28756
-2.45794	-0.78543	-0.49586	-0.90333	1.06081	1.42112	8.81	144.962	3.3824	0	0	1	1.9	3.98	3.01735	0.12914	-0.37951
-2.6246	-0.18371	-0.5506	1.7077	0.85164	1.42112	8.81	86.804	1.3	0	0	1	1.9	3.98	3.04577	0.13619	-0.37067
-2.97101	-4.16468	-0.90862	-1.02152	4.12484	1.1127	8.81	197.657	2.7555	0	0	1	1.83	3.44	3.00673	0.127459	-0.342454
-3.77229	-2.92104	0.23894	0.18396	2.29068	-0.1504	8.81	35.453	-2.996	0	0	1	1.9	3.44	2.88091	0.13988	-0.29366
-4.36514	-3.92534	-0.36732	-3.64255	1.70729	-0.1504	8.81	126.904	-2.996	0	0	1	1.9	3.44	2.87928	0.134855	-0.334505
-4.40835	3.60215	4.48748	-0.5355	0.49612	-0.1504	8.81	111.098	-0.6415	4	2	1	1.9	3.44	2.93263	0.12983	-0.37535
-2.14477	-2.4956	-1.08078	0.83146	2.5205	0.3325	8.81	35.453	-2.996	0	0	1	1.9	3.44	2.94398	0.14377	-0.29334
-2.21175	-1.04285	-0.05968	-2.21849	3.03686	0.7226	8.81	86.804	1.3	0	0	1	1.9	3.98	2.94136	0.1338	-0.39354
-4.12518	-2.69501	1.46375	2.33145	4.06718	0.4201	17.82	80.912	0.5779	0	0	1	1.9	3.44	2.80836	0.14046	-0.31289
-2.3913	-2.10096	1.68929	-0.94846	-2.604	0.4201	17.82	149.069	0.0514	3	0	1	1.9	3.98	2.74455	0.19041	-0.30967
-1.84167	-0.81872	-0.5438	0.90396	2.4395	0.4131	8.81	35.453	-2.996	0	0	2	1.9	3.44	2.947	0.1721	-0.2228
-1.93299	-2.24274	-1.19232	-0.19946	2.97589	1.1127	8.81	79.904	-2.996	0	0	2	1.9	3.44	3.05466	0.1392	-0.27137
-1.46716	-1.93525	-1.48124	0.14798	2.41094	1.1127	8.81	35.453	-2.996	0	0	2	1.9	3.44	3.05468	0.14225	-0.29154
-0.83671	-0.8982	-0.29623	1.08712	1.31425	1.1127	8.81	86.804	1.3	0	0	2	1.9	3.98	2.99581	0.10216	-0.39471
-1.00206	-2.10063	-0.52995	-1.60506	1.26298	1.1127	8.81	144.962	3.3824	0	0	2	1.9	3.98	2.96703	0.09626	-0.40182
-1.5468	-1.59168	-0.31487	-0.70992	3.42504	1.42112	8.81	35.453	-2.996	0	0	2	1.9	3.44	3.10305	0.14701	-0.28756
-1.00949	-0.78543	-0.49586	-0.90333	1.06081	1.42112	8.81	144.962	3.3824	0	0	2	1.9	3.98	3.01735	0.12914	-0.37951
-2.30439	-0.18371	-0.5506	1.7077	0.85164	1.42112	8.81	86.804	1.3	0	0	2	1.9	3.98	3.04577	0.13619	-0.37067
-1.66045	-4.16468	-0.90862	-1.02152	4.12484	1.1127	8.81	197.657	2.7555	0	0	2	1.83	3.44	3.00673	0.127459	-0.342454
-3.77229	-2.92104	0.23894	0.18396	2.29068	-0.1504	8.81	35.453	-2.996	0	0	2	1.9	3.44	2.88091	0.13988	-0.29366
-2.46412	-3.92534	-0.36732	-3.64255	1.70729	-0.1504	8.81	126.904	-2.996	0	0	2	1.9	3.44	2.87928	0.134855	-0.334505
-4.40835	3.60215	4.48748	-0.5355	0.49612	-0.1504	8.81	111.098	-0.6415	4	2	2	1.9	3.44	2.93263	0.12983	-0.37535
-2.75008	-2.4956	-1.08078	0.83146	2.5205	0.3325	8.81	35.453	-2.996	0	0	2	1.9	3.44	2.94398	0.14377	-0.29334
-3.65806	-1.04285	-0.05968	-2.21849	3.03686	0.7226	8.81	86.804	1.3	0	0	2	1.9	3.98	2.94136	0.1338	-0.39354
-3.87315	-2.69501	1.46375	2.33145	4.06718	0.4201	17.82	80.912	0.5779	0	0	2	1.9	3.44	2.80836	0.14046	-0.31289
-4.21347	-2.10096	1.68929	-0.94846	-2.604	0.4201	17.82	149.069	0.0514	3	0	2	1.9	3.98	2.74455	0.19041	-0.30967
-3.62572	-0.81872	-0.5438	0.90396	2.4395	0.4131	8.81	35.453	-2.996	0	0	3	1.9	3.44	2.947	0.1721	-0.2228
-3.70061	-2.24274	-1.19232	-0.19946	2.97589	1.1127	8.81	79.904	-2.996	0	0	3	1.9	3.44	3.05466	0.1392	-0.27137
-3.00161	-1.93525	-1.48124	0.14798	2.41094	1.1127	8.81	35.453	-2.996	0	0	3	1.9	3.44	3.05468	0.14225	-0.29154
-3.21372	-0.8982	-0.29623	1.08712	1.31425	1.1127	8.81	86.804	1.3	0	0	3	1.9	3.98	2.99581	0.10216	-0.39471
-3.22872	-2.10063	-0.52995	-1.60506	1.26298	1.1127	8.81	144.962	3.3824	0	0	3	1.9	3.98	2.96703	0.09626	-0.40182
-3.12581	-1.59168	-0.31487	-0.70992	3.42504	1.42112	8.81	35.453	-2.996	0	0	3	1.9	3.44	3.10305	0.14701	-0.28756
-2.92988	-0.78543	-0.49586	-0.90333	1.06081	1.42112	8.81	144.962	3.3824	0	0	3	1.9	3.98	3.01735	0.12914	-0.37951
-3.72728	-0.18371	-0.5506	1.7077	0.85164	1.42112	8.81	86.804	1.3	0	0	3	1.9	3.98	3.04577	0.13619	-0.37067
-4.31016	-4.16468	-0.90862	-1.02152	4.12484	1.1127	8.81	197.657	2.7555	0	0	3	1.83	3.44	3.00673	0.127459	-0.342454
-2.63597	-2.92104	0.23894	0.18396	2.29068	-0.1504	8.81	35.453	-2.996	0	0	3	1.9	3.44	2.88091	0.13988	-0.29366
-2.92935	-3.92534	-0.36732	-3.64255	1.70729	-0.1504	8.81	126.904	-2.996	0	0	3	1.9	3.44	2.87928	0.134855	-0.334505
-4.40835	3.60215	4.48748	-0.5355	0.49612	-0.1504	8.81	111.098	-0.6415	4	2	3	1.9	3.44	2.93263	0.12983	-0.37535
-2.75885	-2.4956	-1.08078	0.83146	2.5205	0.3325	8.81	35.453	-2.996	0	0	3	1.9	3.44	2.94398	0.14377	-0.29334
-3.85001	-1.04285	-0.05968	-2.21849	3.03686	0.7226	8.81	86.804	1.3	0	0	3	1.9	3.98	2.94136	0.1338	-0.39354
-3.87315	-2.69501	1.46375	2.33145	4.06718	0.4201	17.82	80.912	0.5779	0	0	3	1.9	3.44	2.80836	0.14046	-0.31289
-3.10132	-2.10096	1.68929	-0.94846	-2.604	0.4201	17.82	149.069	0.0514	3	0	3	1.9	3.98	2.74455	0.19041	-0.30967
-3.62572	-0.81872	-0.5438	0.90396	2.4395	0.4131	8.81	35.453	-2.996	0	0	4	1.9	3.44	2.947	0.1721	-0.2228
-2.6587	-2.24274	-1.19232	-0.19946	2.97589	1.1127	8.81	79.904	-2.996	0	0	4	1.9	3.44	3.05466	0.1392	-0.27137
-3.00161	-1.93525	-1.48124	0.14798	2.41094	1.1127	8.81	35.453	-2.996	0	0	4	1.9	3.44	3.05468	0.14225	-0.29154
-3.12338	-0.8982	-0.29623	1.08712	1.31425	1.1127	8.81	86.804	1.3	0	0	4	1.9	3.98	2.99581	0.10216	-0.39471
-3.0309	-2.10063	-0.52995	-1.60506	1.26298	1.1127	8.81	144.962	3.3824	0	0	4	1.9	3.98	2.96703	0.09626	-0.40182
-2.58931	-1.59168	-0.31487	-0.70992	3.42504	1.42112	8.81	35.453	-2.996	0	0	4	1.9	3.44	3.10305	0.14701	-0.28756
-3.43714	-0.78543	-0.49586	-0.90333	1.06081	1.42112	8.81	144.962	3.3824	0	0	4	1.9	3.98	3.01735	0.12914	-0.37951
-1.93351	-0.18371	-0.5506	1.7077	0.85164	1.42112	8.81	86.804	1.3	0	0	4	1.9	3.98	3.04577	0.13619	-0.37067
-4.31016	-4.16468	-0.90862	-1.02152	4.12484	1.1127	8.81	197.657	2.7555	0	0	4	1.83	3.44	3.00673	0.127459	-0.342454
-2.06108	-2.92104	0.23894	0.18396	2.29068	-0.1504	8.81	35.453	-2.996	0	0	4	1.9	3.44	2.88091	0.13988	-0.29366
-2.53268	-3.92534	-0.36732	-3.64255	1.70729	-0.1504	8.81	126.904	-2.996	0	0	4	1.9	3.44	2.87928	0.134855	-0.334505
-4.61895	3.60215	4.48748	-0.5355	0.49612	-0.1504	8.81	111.098	-0.6415	4	2	4	1.9	3.44	2.93263	0.12983	-0.37535
-2.75885	-2.4956	-1.08078	0.83146	2.5205	0.3325	8.81	35.453	-2.996	0	0	4	1.9	3.44	2.94398	0.14377	-0.29334
-3.85001	-1.04285	-0.05968	-2.21849	3.03686	0.7226	8.81	86.804	1.3	0	0	4	1.9	3.98	2.94136	0.1338	-0.39354
-3.87315	-2.69501	1.46375	2.33145	4.06718	0.4201	17.82	80.912	0.5779	0	0	4	1.9	3.44	2.80836	0.14046	-0.31289
-3.03737	-2.10096	1.68929	-0.94846	-2.604	0.4201	17.82	149.069	0.0514	3	0	4	1.9	3.98	2.74455	0.19041	-0.30967
