# Supplementary material for: Engineered Microenvironment of Imidazolium Salts by Multi-scale Modeling and Machine Learning Algorithms for Enhanced Electrocatalytic CO2 Reduction to Ethylene and Acetamide via Targeted Delivery of CuAg Alloy Tandem Catalyst Based on Cu(111) Facet
Source: Research Square preprint supplement (doi:10.21203/rs.3.rs-6647633/v1), 2025-05-19
Supplement: Supplementary file 32 [file Pearson_Binding energy before coupling.xlsx]

## Sheet: Sheet1
sample	CCO+HNH2	CO+CO	CHO+CHO	COH+COH	CH2+CH2	CH+CH	CHOH+CHOH	CHOH+CO	CHOH+CHO	CHOH+COH	CO+COH	CO+CHO	CHO+COH
A2084	1.11664	3.23809	3.11264	5.46471	0.83995	2.19475	4.2818	3.56402	4.37686	4.54313	2.92131	4.44666	1.29104
B2193	0.91243	2.10462	2.71802	3.6875	0.34694	1.76332	4.5265	3.68667	4.21374	5.1112	2.42754	2.94574	1.91195
B2194	2.08006	2.51849	2.83145	4.31194	1.05652	2.17998	4.80019	4.3948	4.0789	5.23069	3.06696	3.12667	1.90666
B2195	0.88472	2.22487	2.33948	3.5014	-0.03389	1.41576	2.61463	3.6549	3.5894	4.3483	3.07549	2.97849	-0.85893
B2320	1.44973	1.78782	3.2345	4.27225	0.00825	2.27792	4.14714	3.24083	3.68911	4.95295	2.97897	2.04236	0.44009
B2473	2.03158	2.8793	2.9085	4.15958	1.01702	1.70607	3.89013	4.19872	4.14649	3.65926	3.29342	2.87158	2.04718
B2474	2.20973	2.80003	2.65715	3.81597	2.70781	2.32482	4.44642	4.22638	3.80137	4.41921	3.1256	2.38014	-0.56408
B2475	2.68944	4.31084	3.95837	5.81517	2.04201	2.83082	5.44175	5.0217	4.71921	5.8627	3.09679	4.40361	0.27837
B2672	2.9801	2.88602	4.65995	7.71172	2.97118	4.34968	6.10761	6.63853	3.35209	6.5396	3.54386	3.91499	4.75061
D3341	1.43155	2.5939	2.8677	4.1196	2.11943	2.19683	4.45891	4.26575	3.8541	7.61377	2.86363	3.26817	1.16959
D4654	1.34139	1.71736	1.4202	2.58588	0.28482	1.63079	4.83153	3.3654	3.99602	5.17854	2.41256	2.13657	0.60339
D5348	-0.95311	3.53878	3.37497	0.34683	5.12663	2.35936	0.1255	4.44292	4.19595	2.26263	6.58284	-1.30073	-4.4682
E0490	2.58636	3.02717	3.48264	5.97057	0.95628	1.8563	5.37404	4.79827	5.34078	5.51609	3.57579	3.49094	1.97385
M3036	1.85814	3.7239	3.00929	4.55281	1.32551	1.74371	4.20904	3.6576	2.56841	4.54221	3.0923	4.01647	-1.59208
M3212	1.95564	1.63217	2.92153	4.11651	0.90307	2.30428	5.14617	5.10922	3.44884	6.12733	3.02098	2.23819	1.62352
M3214	4.84808	1.90798	5.87207	1.84236	0.18747	3.37084	8.35778	5.03157	4.95067	3.9939	4.49951	1.67477	0.75504
