# Supplementary material for: Engineered Microenvironment of Imidazolium Salts by Multi-scale Modeling and Machine Learning Algorithms for Enhanced Electrocatalytic CO2 Reduction to Ethylene and Acetamide via Targeted Delivery of CuAg Alloy Tandem Catalyst Based on Cu(111) Facet
Source: Research Square preprint supplement (doi:10.21203/rs.3.rs-6647633/v1), 2025-05-19
Supplement: Supplementary file 38 [file Pearson_prior to descriptor of binding energy and coupling energy.xlsx]

## Sheet: Sheet1
Before	CCO+HNH2	CO+CO	CHO+CHO	COH+COH	CH2+CH2	CH+CH	CHOH+CHOH	CHOH+CO	CHOH+CHO	CHOH+COH	CO+COH	CO+CHO	CHO+COH
A2084	1.11664	3.23809	3.11264	5.46471	0.83995	2.19475	4.2818	3.56402	4.37686	4.54313	2.92131	4.44666	1.29104
B2193	0.91243	2.10462	2.71802	3.6875	0.34694	1.76332	4.5265	3.68667	4.21374	5.1112	2.42754	2.94574	1.91195
B2194	2.08006	2.51849	2.83145	4.31194	1.05652	2.17998	4.80019	4.3948	4.0789	5.23069	3.06696	3.12667	1.90666
B2195	0.88472	2.22487	2.33948	3.5014	-0.03389	1.41576	2.61463	3.6549	3.5894	4.3483	3.07549	2.97849	-0.85893
B2320	1.44973	1.78782	3.2345	4.27225	0.00825	2.27792	4.14714	3.24083	3.68911	4.95295	2.97897	2.04236	0.44009
B2473	2.03158	2.8793	2.9085	4.15958	1.01702	1.70607	3.89013	4.19872	4.14649	3.65926	3.29342	2.87158	2.04718
B2474	2.20973	2.80003	2.65715	3.81597	2.70781	2.32482	4.44642	4.22638	3.80137	4.41921	3.1256	2.38014	-0.56408
B2475	2.68944	4.31084	3.95837	5.81517	2.04201	2.83082	5.44175	5.0217	4.71921	5.8627	3.09679	4.40361	0.27837
B2672	2.9801	2.88602	4.65995	7.71172	2.97118	4.34968	6.10761	6.63853	3.35209	6.5396	3.54386	3.91499	4.75061
D3341	1.43155	2.5939	2.8677	4.1196	2.11943	2.19683	4.45891	4.26575	3.8541	7.61377	2.86363	3.26817	1.16959
D4654	1.34139	1.71736	1.4202	2.58588	0.28482	1.63079	4.83153	3.3654	3.99602	5.17854	2.41256	2.13657	0.60339
D5348	-0.95311	3.53878	3.37497	0.34683	5.12663	2.35936	0.1255	4.44292	4.19595	2.26263	6.58284	-1.30073	-4.4682
E0490	2.58636	3.02717	3.48264	5.97057	0.95628	1.8563	5.37404	4.79827	5.34078	5.51609	3.57579	3.49094	1.97385
M3036	1.85814	3.7239	3.00929	4.55281	1.32551	1.74371	4.20904	3.6576	2.56841	4.54221	3.0923	4.01647	-1.59208
M3212	1.95564	1.63217	2.92153	4.11651	0.90307	2.30428	5.14617	5.10922	3.44884	6.12733	3.02098	2.23819	1.62352
M3214	4.84808	1.90798	5.87207	1.84236	0.18747	3.37084	8.35778	5.03157	4.95067	3.9939	4.49951	1.67477	0.75504

## Sheet: Sheet2
Ecplg	CCOHNH2	COCO	CHOCHO	COHCOH	CH2CH2	CHCH	CHOHCHOH	CHOHCO	CHOHCHO	CHOHCOH	COCOH	COCHO	CHOCOH
A2084	-1.26651	-0.81872	3.02814	0.15793	1.2594	1.31288	3.31006	0.69036	3.08531	0.52477	-0.5438	0.90396	2.4395
B2193	-1.24616	-2.24274	3.24739	0.36143	1.26909	0.66913	3.33708	0.77724	3.2878	2.80854	-1.19232	-0.19946	2.97589
B2194	-0.24816	-1.93525	3.20486	0.36472	1.63752	0.77442	3.50205	1.40687	2.25505	2.67467	-1.48124	0.14798	2.41094
B2195	-1.07338	-0.8982	3.65838	-0.17889	0.8133	1.46879	1.40048	1.07528	2.15185	1.07578	-0.29623	1.08712	1.31425
B2320	-0.39222	-2.10063	3.89615	0.47548	0.86477	0.73155	3.65976	0.78596	2.99332	1.98669	-0.52995	-1.60506	1.26298
B2473	0.0464	-1.59168	2.83516	1.3541	1.5481	0.09446	3.17024	0.77524	3.11528	1.54332	-0.31487	-0.70992	3.42504
B2474	0.53466	-0.78543	3.58885	0.03039	3.81111	1.23236	3.44446	-2.49422	2.29214	2.91136	-0.49586	-0.90333	1.06081
B2475	0.47466	-0.18371	3.18223	-0.1366	2.57443	1.51528	3.59074	1.43319	3.15835	3.72378	-0.5506	1.7077	0.85164
B2672	-1.96436	-4.16468	2.54451	5.59629	2.37836	1.72489	2.14602	2.15009	-0.73097	4.23846	-0.90862	-1.02152	4.12484
D3341	-1.20007	-2.92104	2.80797	-2.27738	2.46309	1.37051	3.43187	1.92729	2.0259	5.26117	0.23894	0.18396	2.29068
D4654	-0.49573	-3.92534	1.46714	-2.65813	1.40049	1.71818	4.59333	1.35378	3.25004	3.16278	-0.36732	-3.64255	1.70729
D5348	-1.38504	3.60215	5.42604	-3.60172	5.29833	5.36051	2.4619	0.5892	5.59742	3.75954	4.48748	-0.5355	0.49612
E0490	-0.22428	-2.4956	3.11855	-0.4755	0.912	0.99636	4.39499	0.83859	3.56713	2.20569	-1.08078	0.83146	2.5205
M3036	-2.26228	-1.04285	4.11161	-0.81092	2.05811	-0.85469	3.0403	-0.10428	0.26642	1.0108	-0.05968	-2.21849	3.03686
M3212	1.61465	-2.69501	3.41796	2.27159	1.38651	0.30561	4.43497	4.81458	2.09526	3.3306	1.46375	2.33145	4.06718
M3214	-2.02652	-2.10096	1.29974	-2.66417	-0.40959	-1.5035	5.69699	-0.62904	1.95407	2.47698	1.68929	-0.94846	-2.604
